# Supplementary material for: Accumulation of Carotenoids and Metabolic Profiling in Different Cultivars of Tagetes Flowers
Source: PubMed Central journal article supplement (PMC6155894; doi:10.3390/molecules22020313), 2017-02-18
Supplement: molecules-22-00313-s001.pdf [file molecules-22-00313-s001.pdf]

# Supplementary Materials: Accumulation of Carotenoids and Metabolic Profiling in Different Cultivars of *Tagetes* Flowers

Yun Ji Park <sup>1</sup>, Soo-Yun Park <sup>2</sup>, MariadhasValanArasu <sup>3</sup>, Naif Abdullah Al-Dhabi <sup>3</sup>, Hyung-geun Ahn <sup>4</sup>, Jae Kwang Kim<sup>5,\*</sup>, Sang Un Park<sup>1,\*</sup>

**Table S1: Metabolites identified in GC-TOFMS chromatograms of Marigold flowers (cv. Durango Yellow) extracts**

| No. <sup>1)</sup> | Compound                      | RT <sup>2)</sup> | RRT <sup>3)</sup> | Selected ion for quantification <sup>4)</sup> |
|-------------------|-------------------------------|------------------|-------------------|-----------------------------------------------|
| 1                 | Lactic acid                   | 4.80             | 0.442             | 147                                           |
| 2                 | Valine                        | 5.20             | 0.479             | 146                                           |
| 3                 | Glycolic acid                 | 6.40             | 0.589             | 147                                           |
| 4                 | Serine                        | 6.96             | 0.641             | 116                                           |
| 5                 | Ethanolamine                  | 7.04             | 0.648             | 174                                           |
| 6                 | Glycerol                      | 7.06             | 0.650             | 147                                           |
| 7                 | Isoleucine                    | 7.30             | 0.672             | 158                                           |
| 8                 | Nicotinic acid                | 7.42             | 0.683             | 180                                           |
| 9                 | Glycine                       | 7.44             | 0.685             | 174                                           |
| 10                | Succinic acid                 | 7.51             | 0.692             | 147                                           |
| 11                | Glyceric acid                 | 7.61             | 0.701             | 147                                           |
| 12                | Fumaric acid                  | 7.85             | 0.723             | 245                                           |
| 13                | Threonine                     | 8.14             | 0.750             | 219                                           |
| 14                | $\beta$ -alanine              | 8.56             | 0.788             | 174                                           |
| 15                | Malic acid                    | 9.06             | 0.834             | 147                                           |
| 16                | Salicylic acid                | 9.31             | 0.857             | 267                                           |
| 17                | Aspartic acid                 | 9.31             | 0.857             | 100                                           |
| 18                | Methionine                    | 9.37             | 0.863             | 176                                           |
| 19                | Pyroglutamic acid             | 9.41             | 0.866             | 156                                           |
| 20                | 4-aminobutyric acid           | 9.44             | 0.869             | 174                                           |
| 21                | Threonic acid                 | 9.59             | 0.883             | 147                                           |
| 22                | Glutamic acid                 | 10.12            | 0.932             | 246                                           |
| 23                | Phenylalanine                 | 10.25            | 0.944             | 218                                           |
| 24                | <i>p</i> -Hydroxybenzoic acid | 10.27            | 0.946             | 223                                           |
| 25                | Xylose                        | 10.34            | 0.952             | 103                                           |
| 26                | Asparagine                    | 10.52            | 0.969             | 116                                           |
| IS                | Ribitol                       | 10.86            | 1.000             | 217                                           |
| 27                | Vanillic acid                 | 11.28            | 1.039             | 297                                           |
| 28                | Glutamine                     | 11.30            | 1.041             | 156                                           |
| 29                | Shikimic acid                 | 11.45            | 1.054             | 204                                           |
| 30                | Citric acid                   | 11.58            | 1.066             | 273                                           |
| 31                | Quinic acid                   | 11.84            | 1.090             | 345                                           |
| 32                | Fructose                      | 11.95            | 1.100             | 103                                           |
| 33                | Galactose                     | 12.07            | 1.111             | 147                                           |
| 34                | Glucose                       | 12.12            | 1.116             | 147                                           |

|    |               |       |       |     |
|----|---------------|-------|-------|-----|
| 35 | Syringic acid | 12.22 | 1.125 | 297 |
| 36 | Mannose       | 12.25 | 1.128 | 147 |
| 37 | Manitol       | 12.31 | 1.134 | 319 |
| 38 | Inositol      | 13.39 | 1.233 | 305 |
| 39 | Ferulic acid  | 13.50 | 1.243 | 338 |
| 40 | Tryptophane   | 14.23 | 1.310 | 202 |
| 41 | Sucrose       | 16.34 | 1.505 | 217 |
| 42 | Trehalose     | 16.88 | 1.554 | 191 |

---

<sup>1)</sup> Numbers represent the compound index for the chromatogram peaks shown in Figure 4.

<sup>2)</sup> Retention time (min).

<sup>3)</sup> Relative retention time (retention time of the analyte/retention time of the IS).

<sup>4)</sup> Specific mass ion used for quantification.
